# Supplementary material for: On the Oral Microbiome of Oral Potentially Malignant and Malignant Disorders: Dysbiosis, Loss of Diversity, and Pathogens Enrichment
Source: Int J Mol Sci. 2023 Feb 9;24(4):3466. doi: 10.3390/ijms24043466 (PMC9961214; doi:10.3390/ijms24043466)
Supplement: Supplementary file 1 [file ijms-24-03466-s001.zip]

Archive with 5 entries (5 files):
- Supplementary Data S1.pdf
- Supplementary Data S2.pdf
- Supplementary Data S3.html
- Supplementary Data S4.pdf
- Supplementary Data S5.pdf
