# Supplementary material for: On the Oral Microbiome of Oral Potentially Malignant and Malignant Disorders: Dysbiosis, Loss of Diversity, and Pathogens Enrichment
Source: Int J Mol Sci. 2023 Feb 9;24(4):3466. doi: 10.3390/ijms24043466 (PMC9961214; doi:10.3390/ijms24043466)
Supplement: Supplementary file 1 [file ijms-24-03466-s001.zip › Supplementary Data S1.pdf]

**Supplementary Data S1.** Clinicopathological information of the OSCC patients with or without prior history of PVL included in the study.<sup>a</sup>

| Characteristics                         | Control       |       | HL           |      | PVL           |      | OSCC         |      | OSCC-PVL      |       |
|-----------------------------------------|---------------|-------|--------------|------|---------------|------|--------------|------|---------------|-------|
|                                         | N= 11         | %     | N = 9        | %    | N = 12        | %    | N= 10        | %    | N= 8          | %     |
| Age at diagnosis                        | 67.91 ± 12.00 |       | 66.33 ± 8.12 |      | 66.83 ± 12.16 |      | 72.80 ± 9.05 |      | 80.25 ± 12.42 |       |
| Gender                                  |               |       |              |      |               |      |              |      |               |       |
| Male                                    | 5             | 45.5  | 4            | 44.4 | 3             | 25.0 | 6            | 60.0 | 6             | 75.0  |
| Female                                  | 6             | 54.5  | 5            | 55.6 | 9             | 75.0 | 4            | 40.0 | 2             | 25.0  |
| Tobacco smoking                         |               |       |              |      |               |      |              |      |               |       |
| Yes                                     | 2             | 18.2  | 4            | 44.4 | 5             | 41.7 | 4            | 40.0 | 1             | 12.5  |
| No                                      | 9             | 81.8  | 5            | 55.6 | 7             | 58.3 | 6            | 60.0 | 7             | 87.5  |
| Alcoholism                              |               |       |              |      |               |      |              |      |               |       |
| Yes                                     | 0             | 0.0   | 2            | 22.2 | 1             | 8.3  | 1            | 10.0 | 0             | 0.0   |
| No                                      | 11            | 100.0 | 7            | 77.8 | 11            | 91.7 | 9            | 90.0 | 8             | 100.0 |
| Sampling location                       |               |       |              |      |               |      |              |      |               |       |
| Gingiva                                 | 8             | 72.7  | 1            | 11.1 | 3             | 30.0 | 3            | 30.0 | 5             | 62.5  |
| Palate                                  | 0             | 0.0   | 1            | 11.1 | 1             | 10.0 | 1            | 10.0 | 2             | 25.0  |
| Floor of mouth                          | 0             | 0.0   | 2            | 22.2 | 1             | 10.0 | 1            | 10.0 | 0             | 0.0   |
| Tongue                                  | 1             | 9.1   | 3            | 33.3 | 4             | 40.0 | 4            | 40.0 | 0             | 0.0   |
| Buccal mucosa                           | 2             | 18.2  | 1            | 11.1 | 0             | 0.0  | 0            | 0.0  | 1             | 12.5  |
| Lips                                    | 0             | 0.0   | 1            | 11.1 | 1             | 10.0 | 1            | 10.0 | 0             | 0.0   |
| Dysplasia of the non-neoplastic lesions |               |       |              |      |               |      |              |      |               |       |
| Absence                                 |               |       | 2            | 22.2 | 3             | 25.0 |              |      |               |       |
| Mild                                    |               |       | 5            | 55.5 | 7             | 58.4 |              |      |               |       |
| Moderate                                |               |       | 2            | 22.2 | 1             | 8.3  |              |      |               |       |
| Severe                                  |               |       | 0            | 0.0  | 1             | 8.3  |              |      |               |       |
| Clinical form of the OSCC               |               |       |              |      |               |      |              |      |               |       |
| Erythroplastic                          |               |       |              |      |               |      | 0            | 0.0  | 2             | 25.0  |
| Ulcerated                               |               |       |              |      |               |      | 9            | 90.0 | 1             | 12.5  |
| Exophytic                               |               |       |              |      |               |      | 0            | 0.0  | 3             | 37.5  |
| Mixed                                   |               |       |              |      |               |      | 1            | 10.0 | 2             | 25.0  |
| Differentiation grade                   |               |       |              |      |               |      |              |      |               |       |
| G0                                      |               |       |              |      |               |      | 0            | 0.0  | 2             | 25.0  |
| G1                                      |               |       |              |      |               |      | 5            | 50.0 | 4             | 50.0  |
| G2                                      |               |       |              |      |               |      | 4            | 40.0 | 1             | 12.5  |
| G3                                      |               |       |              |      |               |      | 1            | 10.0 | 1             | 12.5  |
| Cancer infiltration                     |               |       |              |      |               |      |              |      |               |       |
| Bone                                    |               |       |              |      |               |      | 3            | 30.0 | 3             | 37.5  |
| Perineural                              |               |       |              |      |               |      | 7            | 70.0 | 2             | 25.0  |
| Lymphovascular                          |               |       |              |      |               |      | 2            | 20.0 | 2             | 25.0  |
| No                                      |               |       |              |      |               |      | 0            | 0.0  | 1             | 10.0  |
| Lymph node metastasis                   |               |       |              |      |               |      |              |      |               |       |
| Yes                                     |               |       |              |      |               |      | 3            | 30.0 | 1             | 12.5  |
| No                                      |               |       |              |      |               |      | 7            | 70.0 | 7             | 87.5  |
| Distant metastasis                      |               |       |              |      |               |      |              |      |               |       |
| Yes                                     |               |       |              |      |               |      | 1            | 10.0 | 0             | 0.0   |
| No                                      |               |       |              |      |               |      | 9            | 90.0 | 8             | 100.0 |
| TNM staging                             |               |       |              |      |               |      |              |      |               |       |
| I                                       |               |       |              |      |               |      | 2            | 20.0 | 1             | 12.5  |
| II                                      |               |       |              |      |               |      | 2            | 20.0 | 3             | 37.5  |
| III                                     |               |       |              |      |               |      | 0            | 0.0  | 1             | 12.5  |
| IV                                      |               |       |              |      |               |      | 6            | 60.0 | 3             | 37.5  |
| Second primary tumors                   |               |       |              |      |               |      |              |      |               |       |
| Yes                                     |               |       |              |      |               |      | 2            | 20.0 | 4             | 50.0  |
| No                                      |               |       |              |      |               |      | 8            | 80.0 | 4             | 50.0  |

<sup>a</sup>No significant differences were found in the clinicopathological characteristics of patients.
