# Supplementary material for: On the Oral Microbiome of Oral Potentially Malignant and Malignant Disorders: Dysbiosis, Loss of Diversity, and Pathogens Enrichment
Source: Int J Mol Sci. 2023 Feb 9;24(4):3466. doi: 10.3390/ijms24043466 (PMC9961214; doi:10.3390/ijms24043466)
Supplement: Supplementary file 1 [file ijms-24-03466-s001.zip › Supplementary Data S2.pdf]

**Supplementary Data S2. Alpha-diversity indexes for oral samples collected from healthy controls and HL, PVL, OSCC and PVL-OSCC patients. Asterisk indicates  $p < 0.05$ .**

| <b>Variable</b> | <b>Control (n=11)</b> | <b>OSCC (n=10)</b> | <b>HL (n=9)</b> | <b>PVL (n=12)</b> | <b>PVL-OSCC (n=8)</b> | <b>P-value</b> |
|-----------------|-----------------------|--------------------|-----------------|-------------------|-----------------------|----------------|
|                 | Mean (SD)             | Mean (SD)          | Mean (SD)       | Mean (SD)         | Mean (SD)             |                |
| Chao1           | 637.94 (306.85)       | 284.18 (166.95)    | 565.53 (295.83) | 652.73 (476.71)   | 320.56 (244.04)       | 0.031*         |
| Shannon         | 4.6 (1.04)            | 3.53 (0.74)        | 4.23 (0.95)     | 4.39 (1.06)       | 3.68 (0.87)           | 0.064          |
| Simpson         | 0.07 (0.04)           | 0.06 (0.02)        | 0.05 (0.03)     | 0.06 (0.03)       | 0.07 (0.03)           | 0.748          |
| Inverse Simpson | 50.32 (45.72)         | 18.55 (17.66)      | 31 (30.43)      | 34.3 (29.64)      | 22.92 (20.11)         | 0.189          |

HL, homogeneous leukoplakia; PVL, proliferative verrucous leukoplakia, OSCC, oral squamous cell carcinoma; PVL-OSCC, oral squamous cell carcinoma preceded by proliferative verrucous leukoplakia
